# Supplementary material for: Enhancing Teak (Tectona grandis) Seedling Growth by Rhizosphere Microbes: A Sustainable Way to Optimize Agroforestry
Source: MDPI journal article supplement (doi:10.3390/microorganisms9091990), 2021-09-19
Supplement: s1 [file s1]

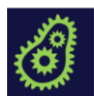

Article

# Enhancing Teak (*Tectona grandis*) Seedling Growth by Rhizosphere Microbes: A Sustainable Way to Optimize Agroforestry

Leardwiriyakool Chaiya <sup>1</sup>, Paiboolya Gavinlertvatana <sup>2</sup>, Neung Teaumroong <sup>3</sup>, Wasu Pathom-aree <sup>1,4</sup>, Amornrat Chaiyasen <sup>5</sup>, Rungroch Sungthong <sup>6,\*</sup> and Saisamorn Lumyong <sup>1,4,7,\*</sup>

<sup>1</sup> Department of Biology, Faculty of Science, Chiang Mai University, Chiang Mai 50200, Thailand; Leardwiriyakool@gmail.com (L.C.); wasu.p@cmu.ac.th (W.P.); scboi009@gmail.com (S.L.)

<sup>2</sup> Thai Orchid Labs Co. Ltd., Khannayao, Bangkok 10230, Thailand; thaiorchidslab@gmail.com

<sup>3</sup> School of Biotechnology, Institute of Agricultural Technology, Suranaree University of Technology, Nakhon Ratchasima 30000, Thailand; neung@sut.ac.th

<sup>4</sup> Center of Excellence in Microbial Diversity and Sustainable Utilization, Faculty of Science, Chiang Mai University, Chiang Mai 50200, Thailand; wasu.p@cmu.ac.th (W.P.); scboi009@gmail.com (S.L.)

<sup>5</sup> Soil Science Research Group, Agricultural Production Science Research and Development Division, Department of Agriculture, Ministry of Agriculture and Cooperatives, Bangkok 10900, Thailand; amornrat057@gmail.com

<sup>6</sup> Laboratory of Hydrology and Geochemistry of Strasbourg, University of Strasbourg, UMR 7517 CNRS/EOST, Strasbourg CEDEX 67084, France; sungthong@unistra.fr

<sup>7</sup> Academy of Science, The Royal Society of Thailand, Bangkok 10300, Thailand; scboi009@gmail.com

\* Correspondence: sungthong@unistra.fr (R.S.), scboi009@gmail.com (S.L.)

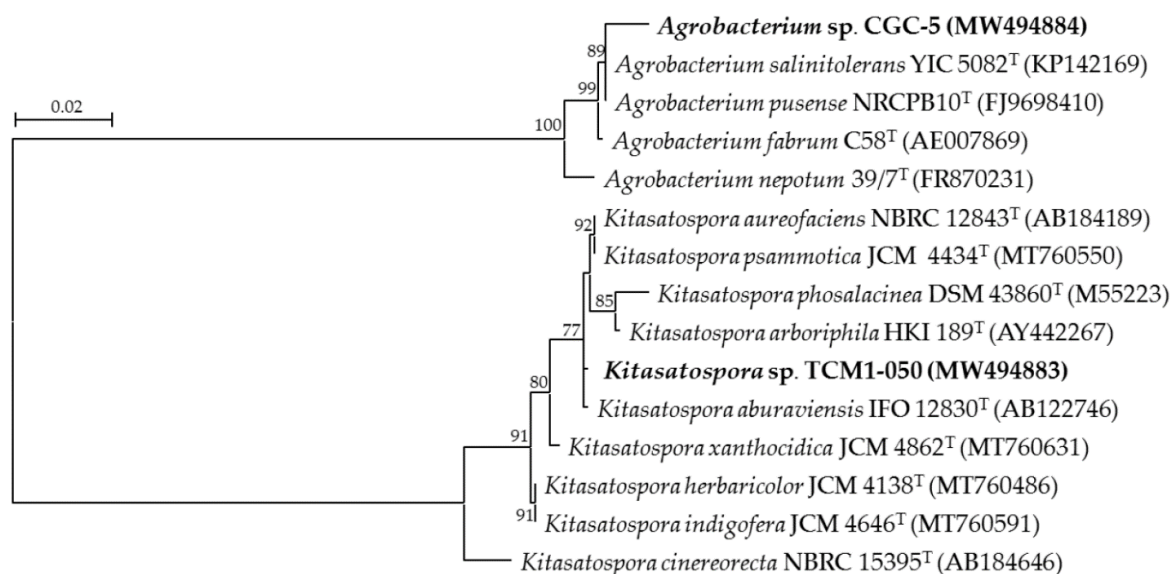

**Figure S1.** Unrooted maximum-likelihood phylogenetic tree of teak rhizobacteria used in this study. The tree was constructed using 16S rRNA gene sequence data derived from isolates CGC-5 and TCM1-050 (in bold) and their closely related phylogenetic species. The GenBank accession number of the gene sequence is presented in the parenthesis. Bootstrap values (based on 1,000 replications) of >60% are at the tree's nodes, and scale bar represents 2% dissimilarity.

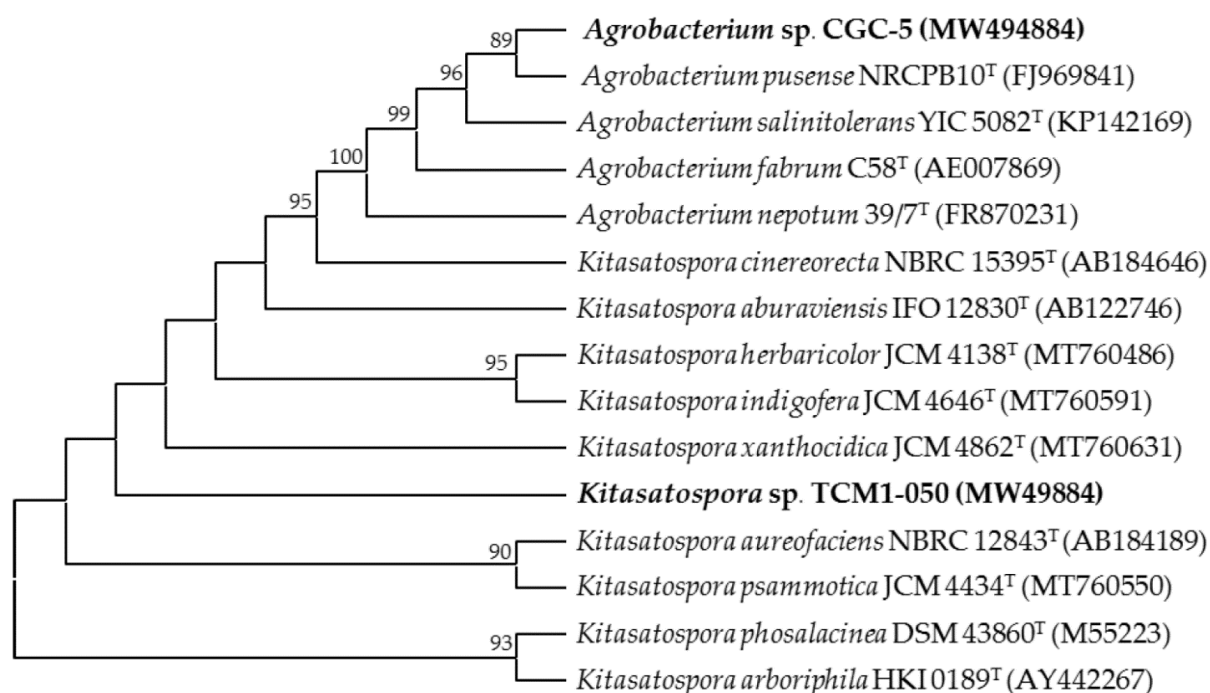

**Figure S2.** Unrooted maximum-parsimony phylogenetic tree of teak rhizobacteria used in this study. The tree was constructed using 16S rRNA gene sequence data derived from isolates CGC-5 and TCM1-050 (in bold) and their closely related phylogenetic species. The GenBank accession number of the gene sequence is presented in the parenthesis. Bootstrap values (based on 1,000 replications) of >60% are at the tree's nodes.
