# Supplementary material for: Enhancing Teak (Tectona grandis) Seedling Growth by Rhizosphere Microbes: A Sustainable Way to Optimize Agroforestry
Source: MDPI journal article supplement (doi:10.3390/microorganisms9091990), 2021-09-19
Supplement: s1 [file s1]

Archive with 1 entries (1 files):
- microorganisms-1385314 supp.pdf
